# Supplementary material for: Engineering in situ: N-doped porous carbon-confined FeF3 for efficient lithium storage
Source: Royal Society of Chemistry journal article supplement (doi:10.1039/d4gc04097j), 2024-01-01
Supplement: d4gc04097j1.pdf [file d4gc04097j1.pdf]

## Supporting Information

### Engineering *In Situ*: N-Doped Porous Carbon-Confined FeF<sub>3</sub> for Efficient Lithium Storage

Jinlong Hu<sup>a</sup>, Weijun Xu<sup>a,b#</sup>, Lingzhi Zhang<sup>a,b\*</sup>

<sup>a</sup> *CAS Key Laboratory of Renewable Energy, Guangdong Provincial Key Laboratory of New and Renewable Energy Research and Development, Guangzhou Institute of Energy Conversion, Chinese Academy of Sciences, Guangzhou 510640, Guangdong, China*

<sup>b</sup> *School of Energy Science and Engineering, University of Science and Technology of China, Hefei 230026, Anhui, China*

**\*Corresponding author**

Tel.: +86 2037246025;

fax: +86 2037246026;

E-mail address: lzzhang@ms.giec.ac.cn

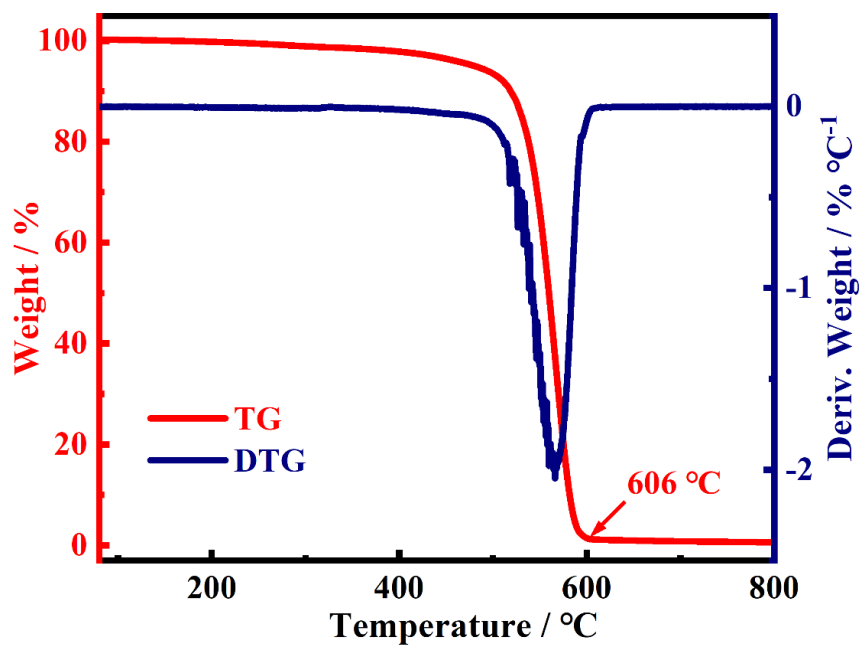

**Fig. S1** TG curve of PTFE in N<sub>2</sub> atmosphere.

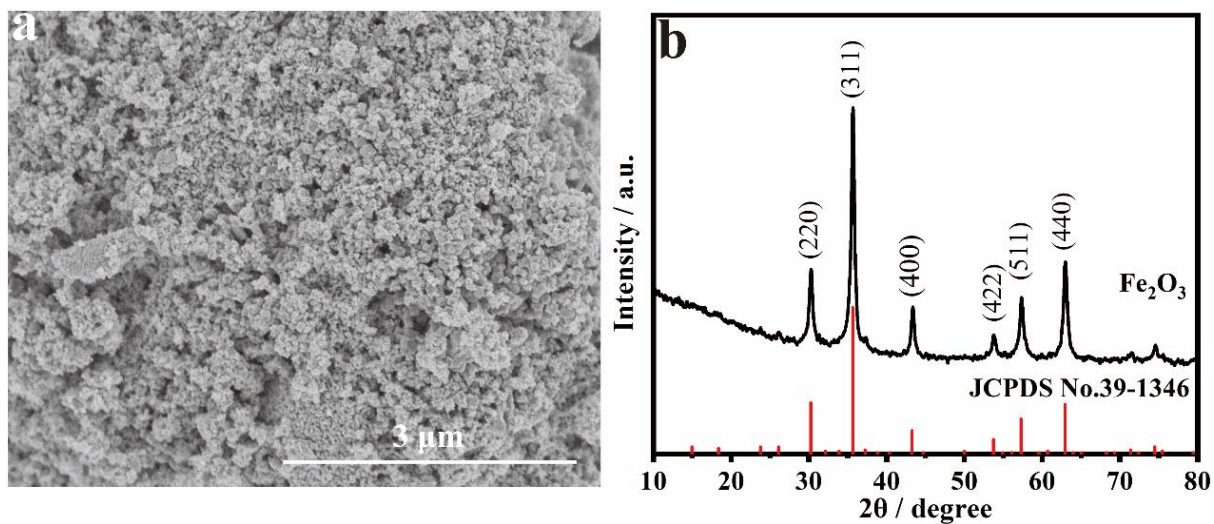

**Fig. S2** (a) SEM image of Fe<sub>2</sub>O<sub>3</sub>; (b) XRD curves of Fe<sub>2</sub>O<sub>3</sub>.

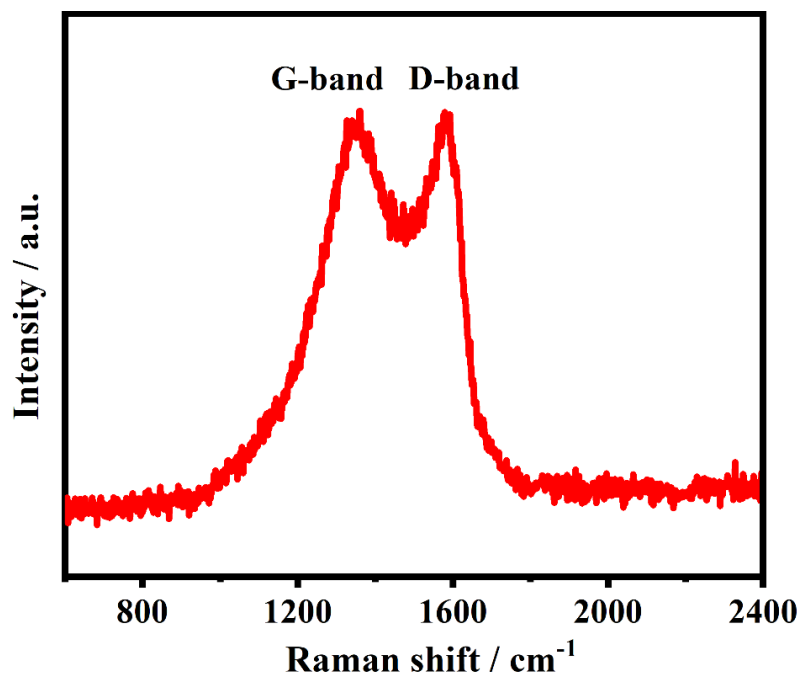

Fig. S3 Raman spectrum of FeF<sub>3</sub>@NPC.

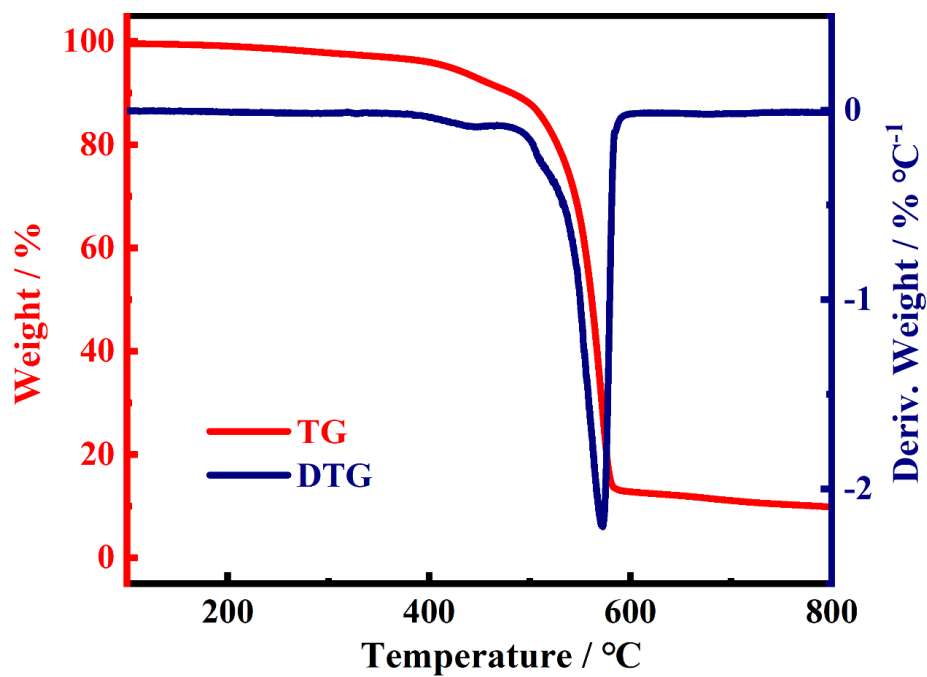

Fig. S4 TG curve of PTFE and Fe<sub>2</sub>O<sub>3</sub>@SOP mixture.

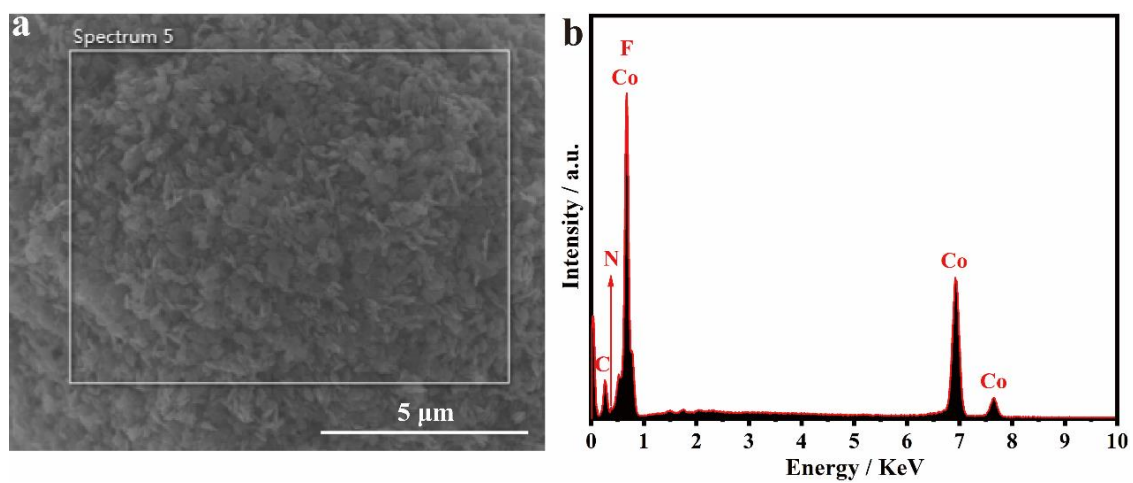

**Fig. S5** (a) SEM image and (b) EDS spectrum of  $\text{CoF}_2@\text{NPC}$ .

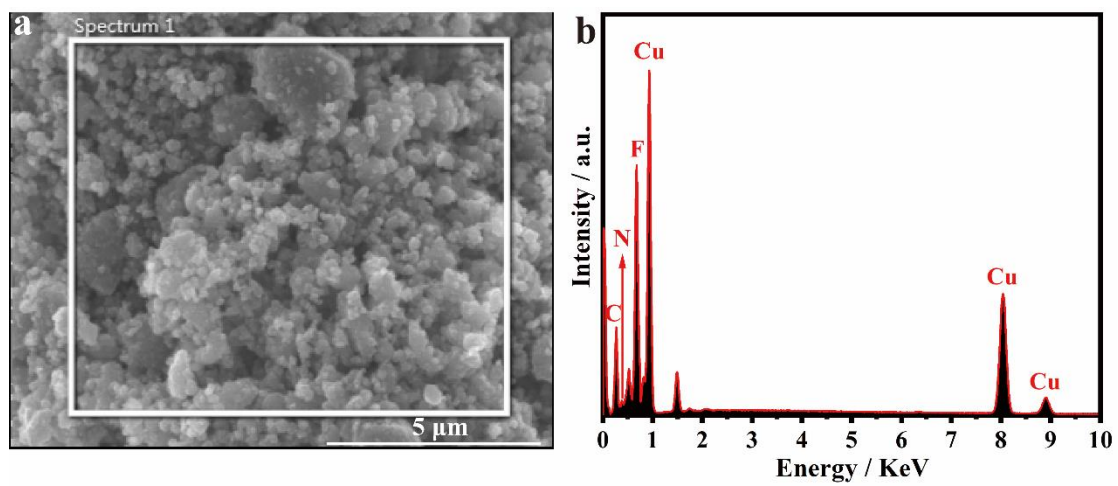

**Fig. S6** (a) SEM image and (b) EDS spectrum of  $\text{CuF}_2@\text{NPC}$ .

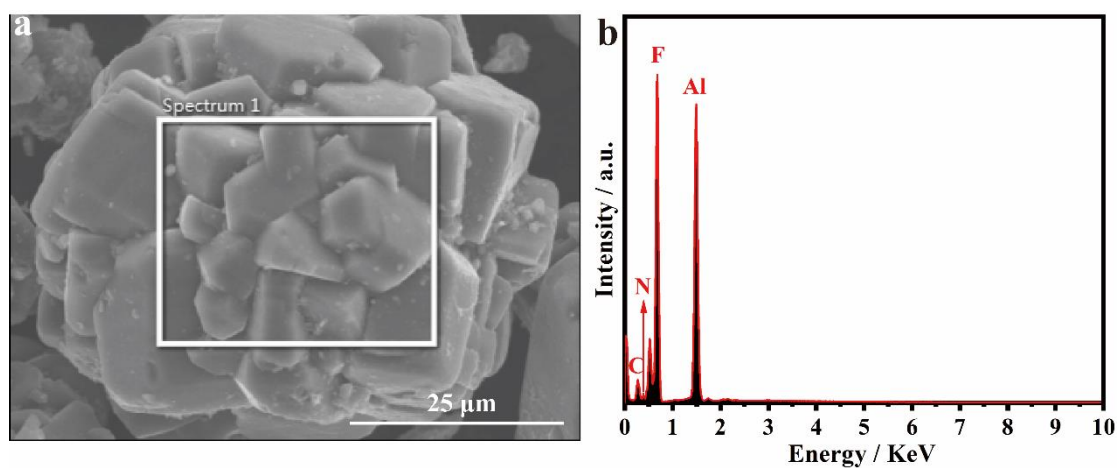

Fig. S7 (a) SEM image and (b) EDS spectrum of  $\text{AlF}_3@\text{NPC}$ .

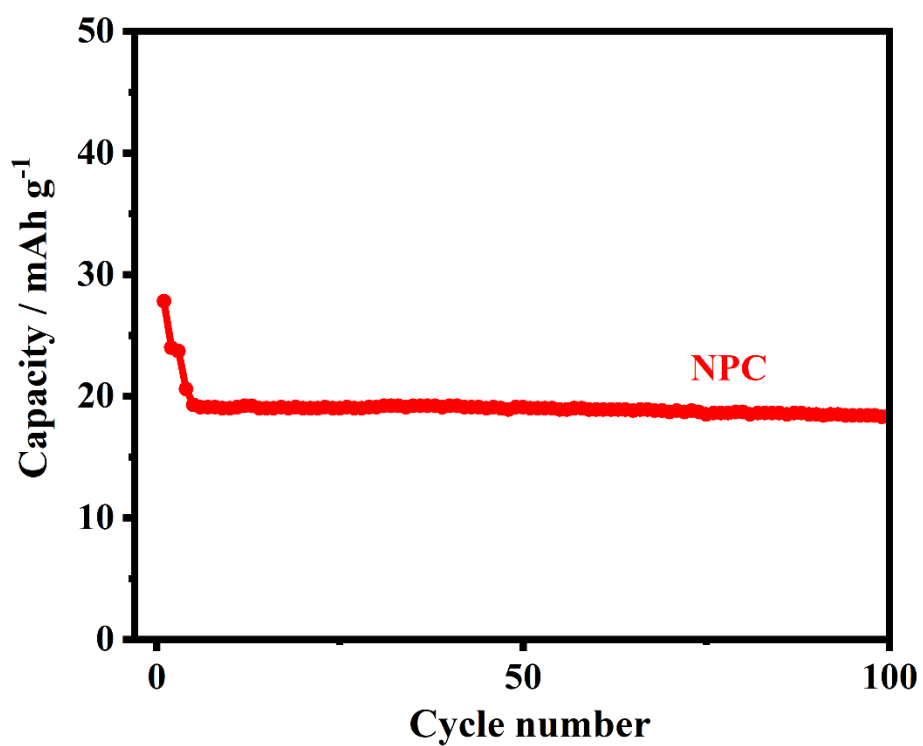

Fig. S8 Cycling performance of NPC at 0.2 C (NPC was obtained by removing  $\text{FeF}_3$  with hydrochloric acid).

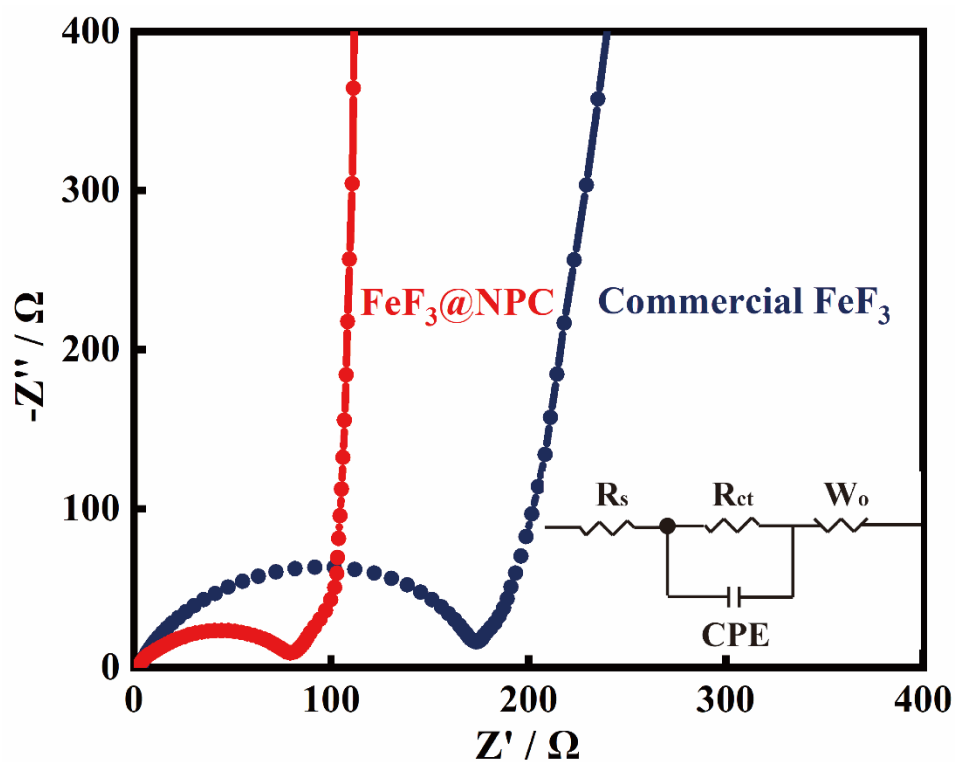

**Fig. S9** EIS curves of  $\text{FeF}_3\text{@NPC}$  and commercial  $\text{FeF}_3$  before cycling with the equivalent circuit as the inset.  $R_s$ : electrolyte resistance;  $R_{ct}$ : charge-transfer resistance;  $W_o$ : Warburg diffusion element.

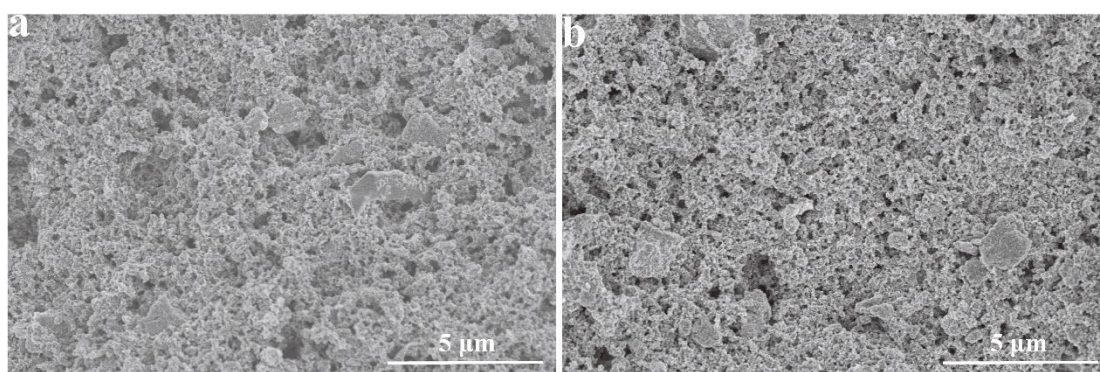

**Fig. S10** (a,b) SEM images of the  $\text{FeF}_3\text{@NPC}$  cathode before and after 100<sup>th</sup> cycles.

**Table S1.** Comparison of representative FeF<sub>3</sub> cathode materials.

| Sample                                       | Current density (mA g <sup>-1</sup> ) | Initial capacity (mAh g <sup>-1</sup> ) | Reversible capacity (mAh g <sup>-1</sup> ) | Voltage region (V) | Ref.      |
|----------------------------------------------|---------------------------------------|-----------------------------------------|--------------------------------------------|--------------------|-----------|
| FeF <sub>3</sub> @NPC                        | 46.8                                  | 249                                     | 203 (100 <sup>th</sup> )                   | 2.0-4.5            | This work |
| FeF <sub>3</sub> /C                          | 23.7                                  | 188                                     | 166 (50 <sup>th</sup> )                    | 2.0-4.5            | [1]       |
| FeF <sub>3</sub> /r-GO                       | 23.7                                  | 205                                     | 168 (50 <sup>th</sup> )                    | 2.0-4.5            | [2]       |
| FeF <sub>3</sub> /Fe/GC                      | 120                                   | 302.1                                   | 215.4 (150 <sup>th</sup> )                 | 2.0-4.5            | [3]       |
| p-FeF <sub>3</sub> @C                        | 23.4                                  | 248.1                                   | 230 (10 <sup>th</sup> )                    | 2.0-4.5            | [4]       |
| FeF <sub>3</sub> /ACF                        | 23.7                                  | 221 (4 <sup>th</sup> )                  | 199 (50 <sup>th</sup> )                    | 2.0-4.5            | [5]       |
| FeF <sub>3</sub> ·0.33H <sub>2</sub> O/Ag/SP | 23.7                                  | 168.2                                   | 128.4 (50 <sup>th</sup> )                  | 2.0-4.5            | [6]       |
| FeF <sub>3</sub> /C                          | 20                                    | 166.4                                   | 126.3 (100 <sup>th</sup> )                 | 2.0-4.5            | [7]       |

**References:**

- [1] T. Kim, W. J. Jae, H. Kim, M. Park, J. M. Han and J. Kim, *J. Mater. Chem. A*, 2016, **4**, 14857-14864.
- [2] H. Jung, H. Song, T. Kim, J.K. Lee, J. Kim, *J. Alloy. Compd.*, 2015, **647**, 750-755.
- [3] Y. S. Shi, P. P. Yin, J. Li, X. Z. Xu, Q. T. Jiang, J. Y. Li, H. M. K. Sari, J. J. Wang, W. B. Li, J. H. Hu, Q. X. Lin, J. Q. Liu, J. Yang and X. F. Li, *Nano Energy*, 2023, **108**, 108181.
- [4] K. Du, R. Tao, C. Guo, H. F. Li, X. L. Liu, P. M. Guo, D. Y. Wang, J.Y. Liang, J. L. Li, S. Dai and X. G. Sun, *Nano Energy*, 2022, **103**, 107862.
- [5] Y. K. Kim, J. K. Lee and J. Kim, *B. Korean Chem. Soc.*, 2015, **36**, 1878-1884.
- [6] S. Wei, X. Wang, M. Jiang and H. Hu, *J. Alloy. Compd.*, 2016, **689**, 945-951.
- [7] J. Li, L. C. Fu, Z. W. Xu, J. J. Zhu, D. Y. Li and L. P. Zhou, *Electrochim. Acta*, 2018, **281**, 88-98.
